# Supplementary material for: Synthesis of siRNAs incorporated with cationic peptides R8G7 and R8A7 and the effect of the modifications on siRNA properties
Source: Royal Society of Chemistry journal article supplement (doi:10.1039/d0ra05919f), 2020-01-01

## **Supplementary Information**

### **Synthesis of siRNAs incorporated with cationic peptides R8G7 and R8A7 and the effect of the modifications on siRNA properties**

**Miho Matsubara<sup>a</sup>, Kenji Honda<sup>a</sup>, Koki Ozaki<sup>a</sup>, Ryohei Kajino<sup>b</sup>, Yuri Kakisawa<sup>a</sup>, Yusuke Maeda<sup>a</sup>, and Yoshihito Ueno<sup>a, b, c</sup>**

<sup>a</sup>Course of Applied Life Science, Faculty of Applied Biological Sciences, Gifu University,

<sup>b</sup>United Graduate School of Agricultural Science, Gifu University, <sup>c</sup>Center for Highly Advanced Integration of Nano and Life Sciences (G-CHAIN), Gifu University 1-1 Yanagido, Gifu, 501-1193, Japan

Fig. S1. UV melting profiles of siRNA 1-5.

$^1\text{H}$  and  $^{13}\text{C}$  NMR spectra of compounds **2**, **3**, **5**, **6**, **8-13**, and  $^{31}\text{P}$  NMR spectra of compounds **13**.

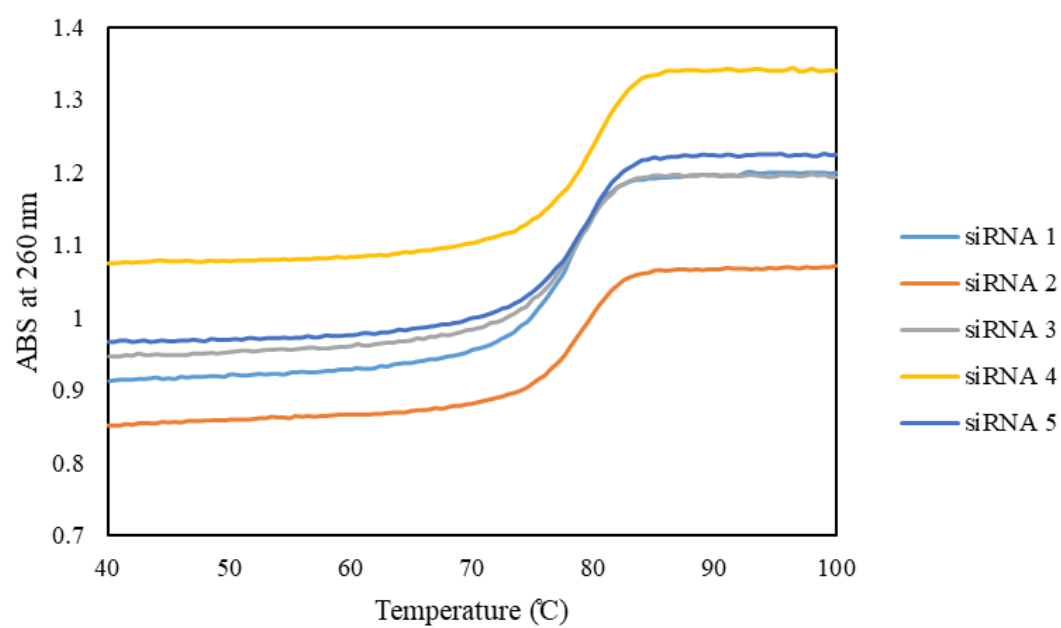

Fig S1. UV melting profiles of siRNA 1-5.

# <sup>1</sup>H NMR spectrum of compound 2

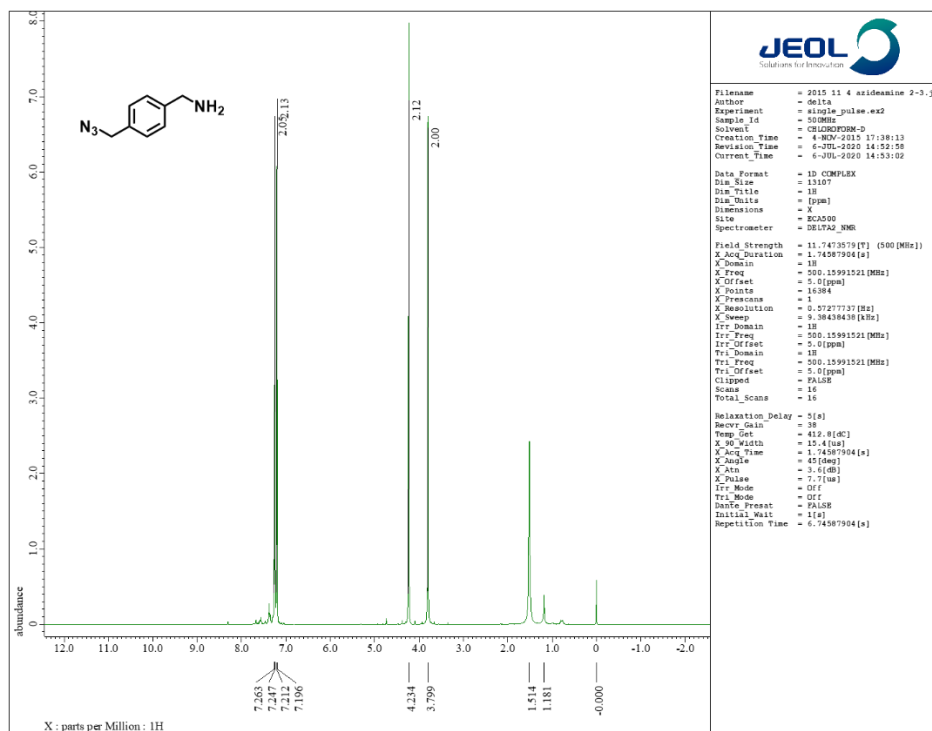

# <sup>13</sup>C NMR spectrum of compound 2

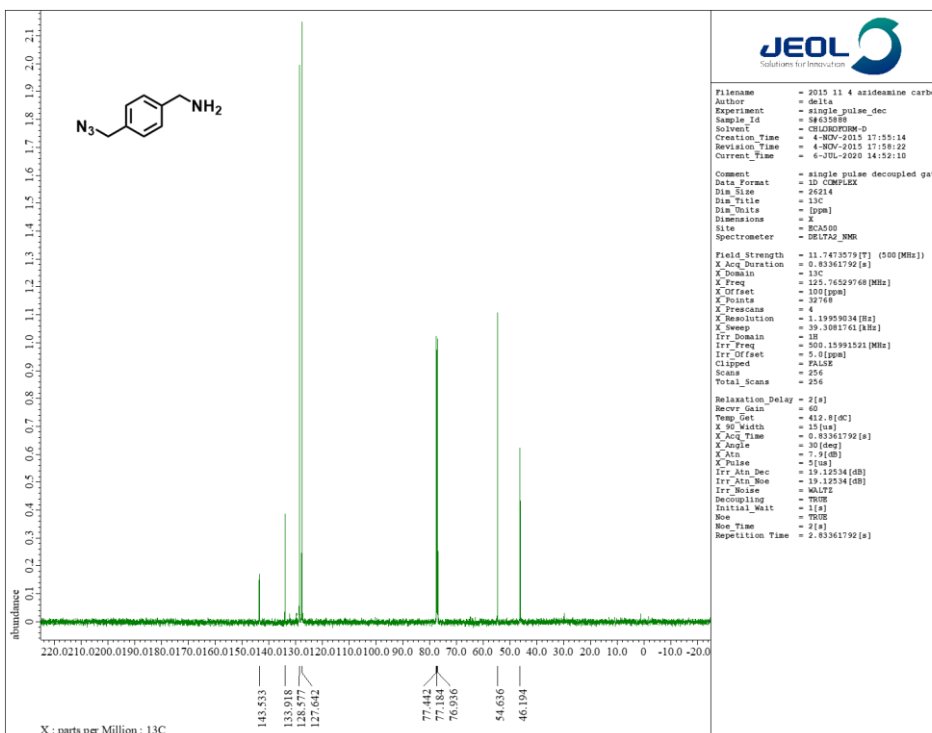

# <sup>1</sup>H NMR spectrum of compound 3

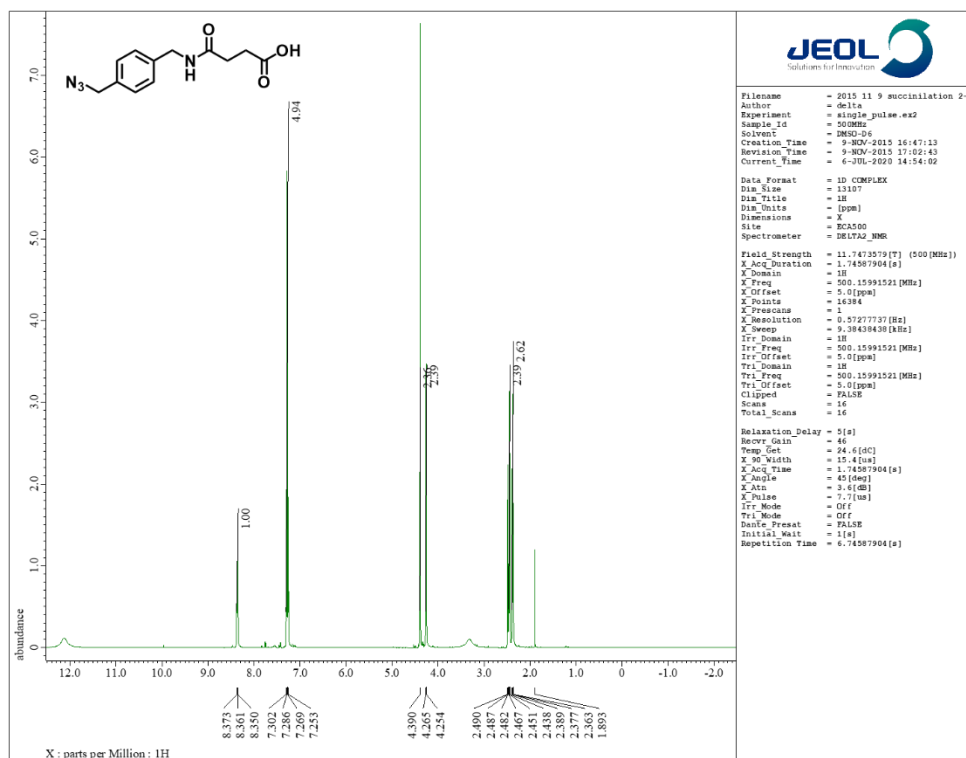

# <sup>13</sup>C NMR spectrum of compound 3

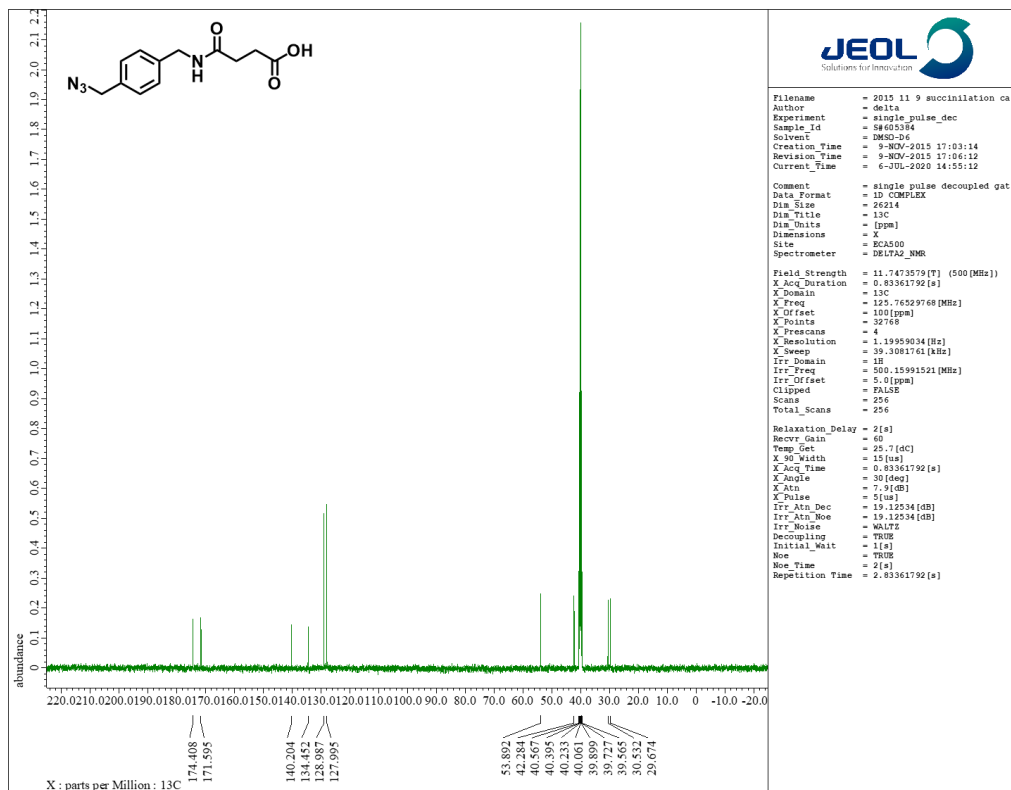

# <sup>1</sup>H NMR spectrum of compound **5**

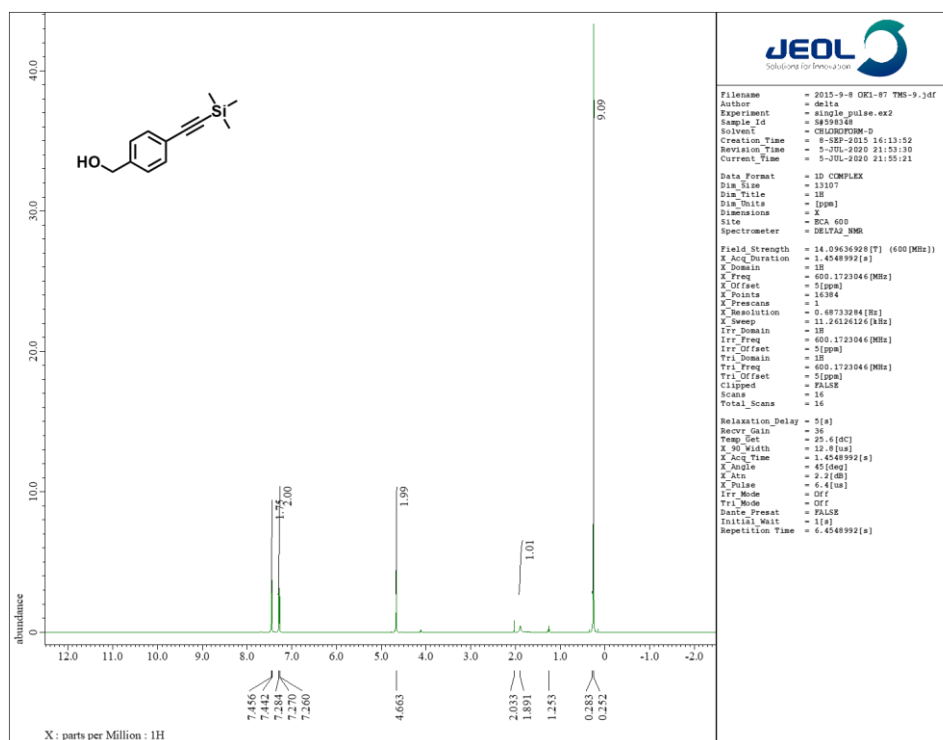

# <sup>13</sup>C NMR spectrum of compound **5**

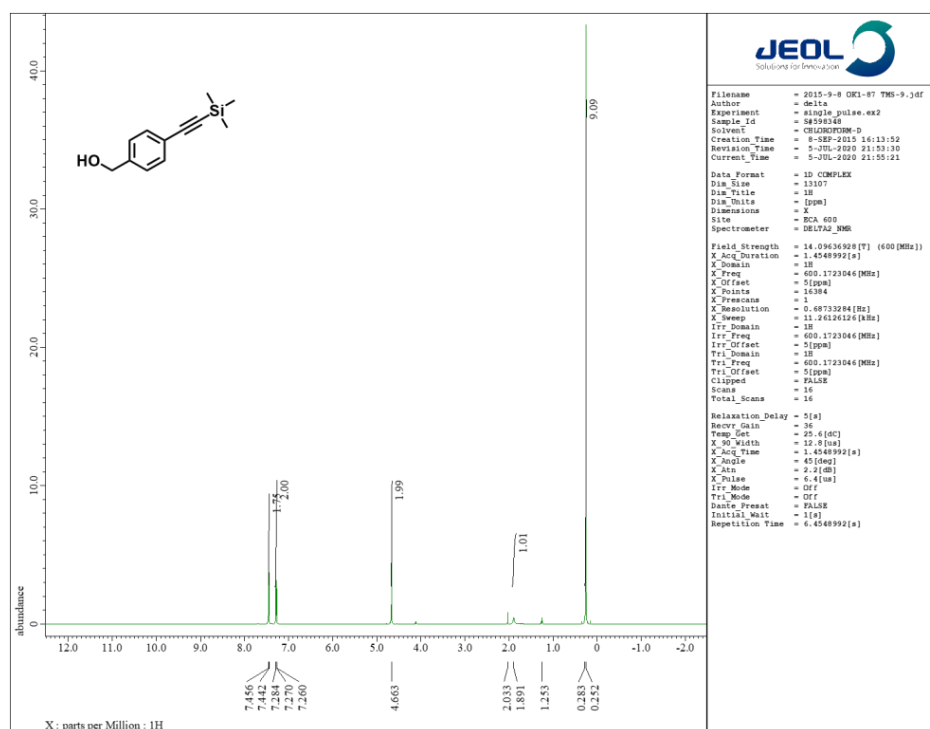

# <sup>1</sup>H NMR spectrum of compound 6

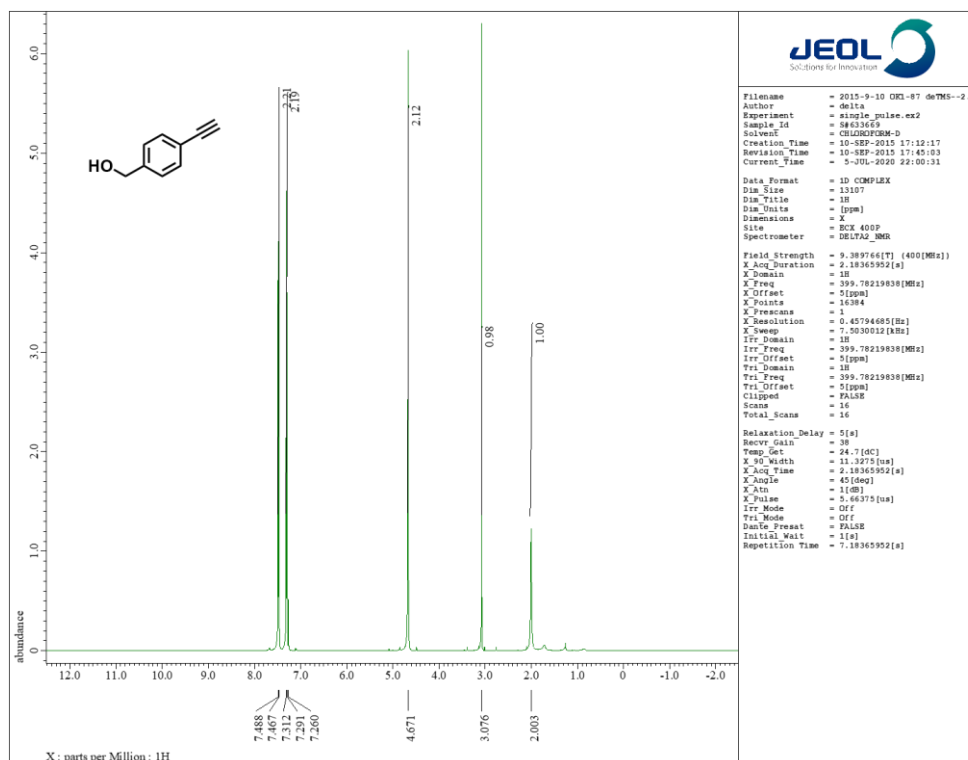

# <sup>13</sup>C NMR spectrum of compound 6

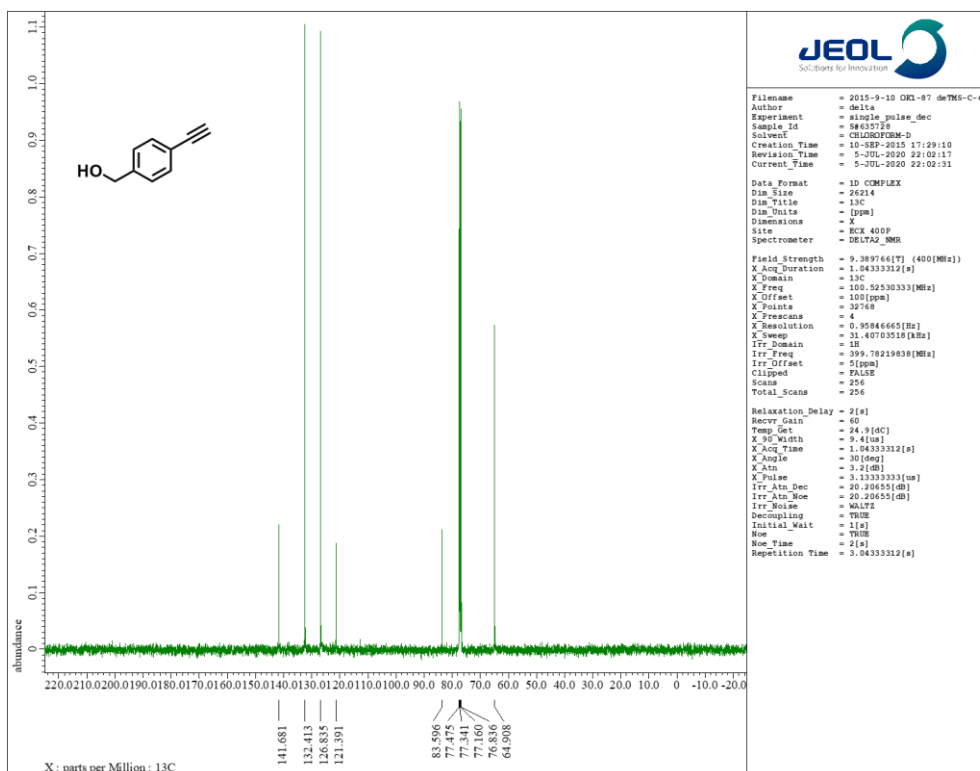

# <sup>1</sup>H NMR spectrum of compound 8

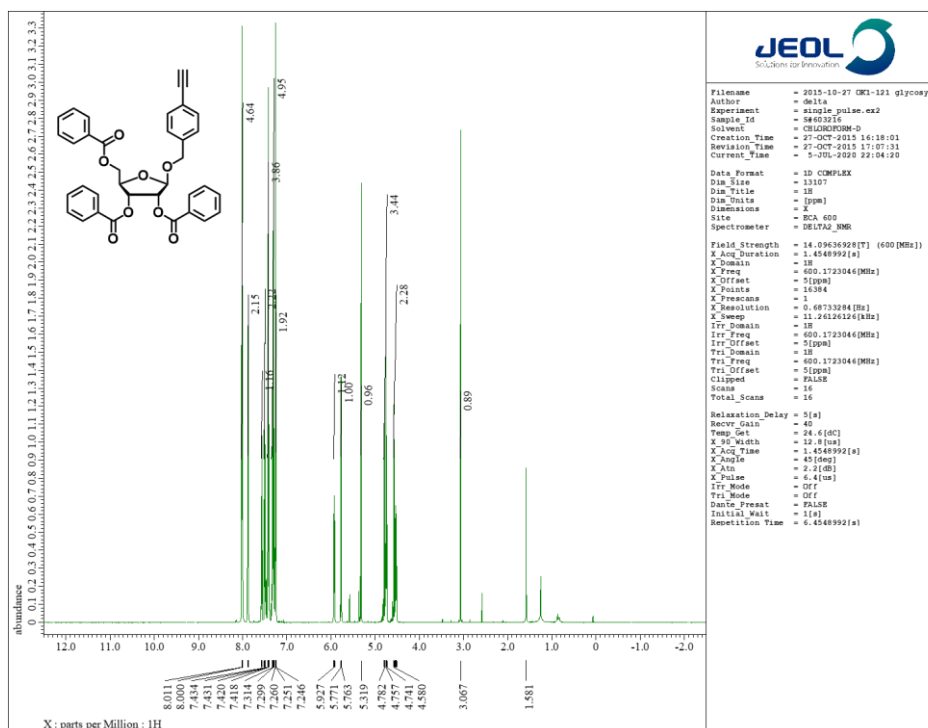

# <sup>13</sup>C NMR spectrum of compound 8

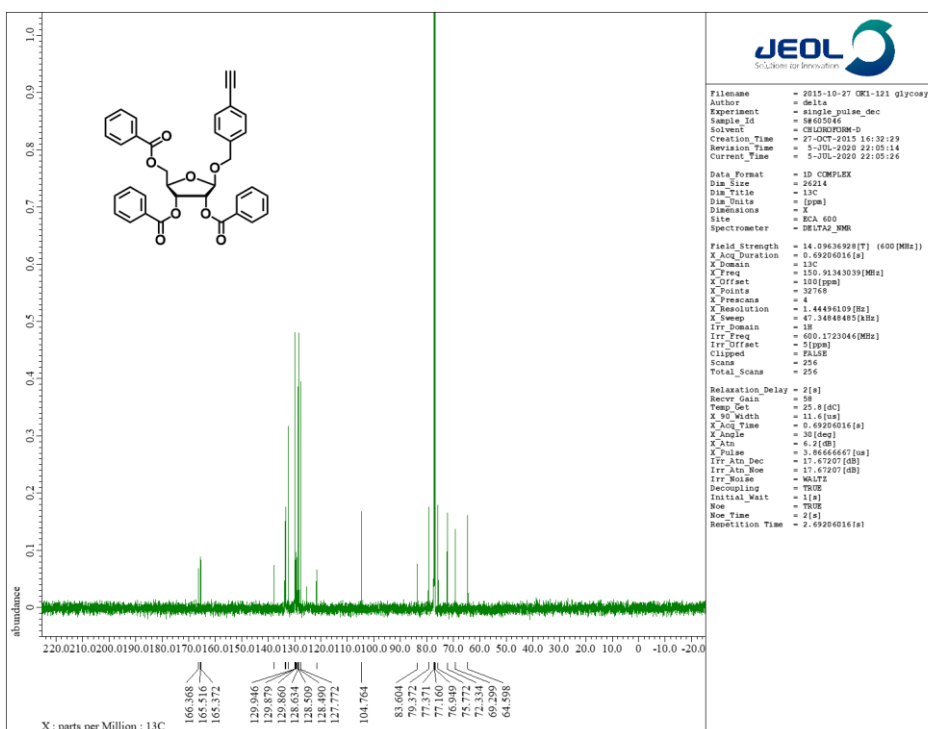



# <sup>1</sup>H NMR spectrum of compound 9

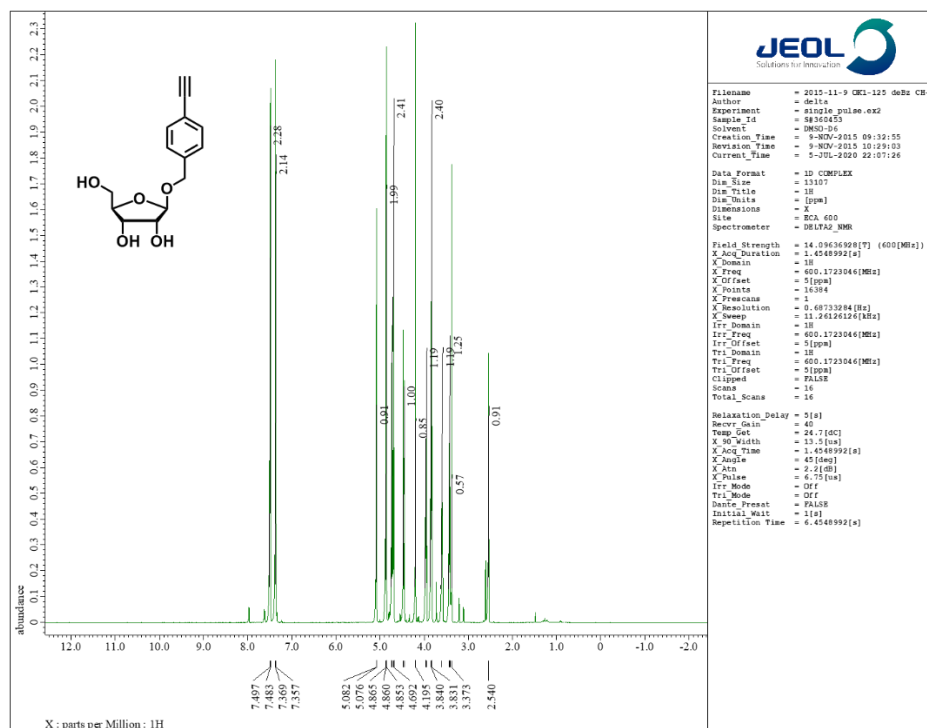

# <sup>13</sup>C NMR spectrum of compound 9

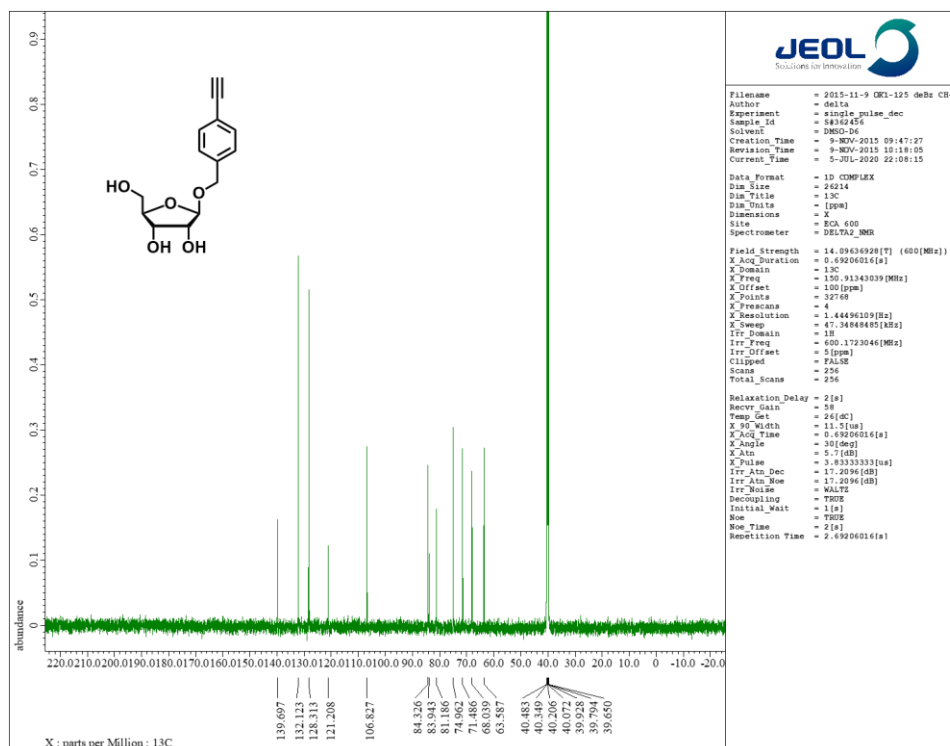

# <sup>1</sup>H NMR spectrum of compound **10**

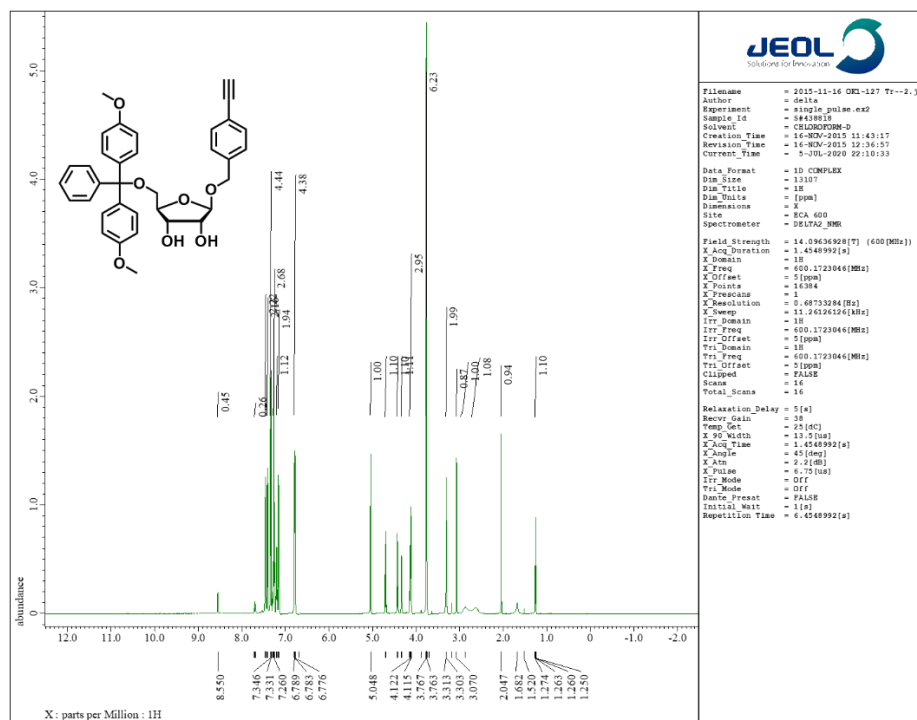

# <sup>13</sup>C NMR spectrum of compound **10**

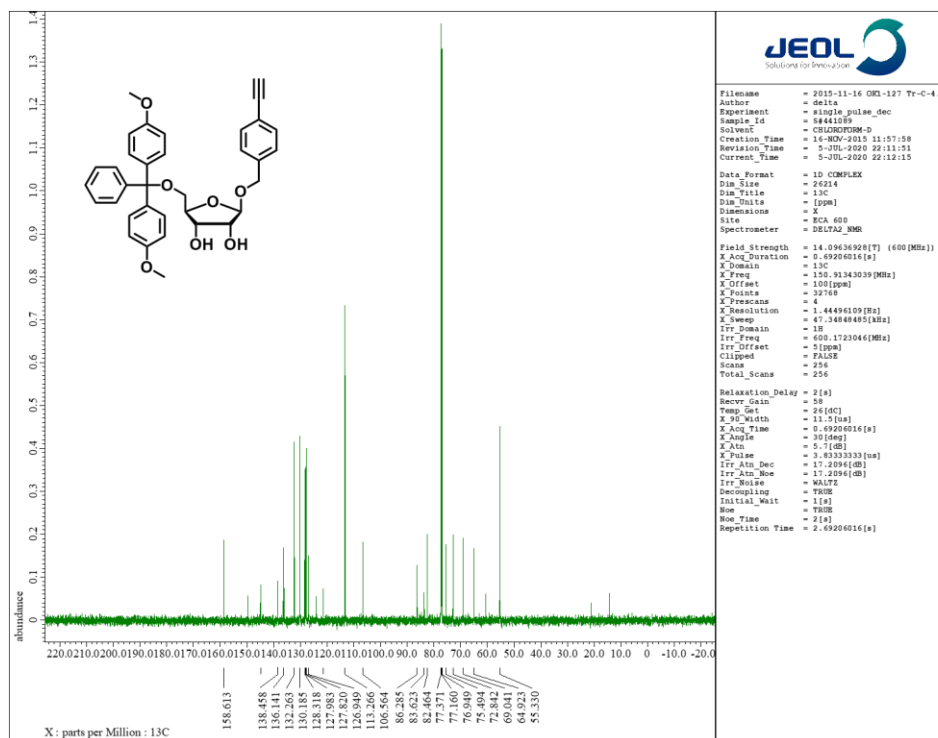

# <sup>1</sup>H NMR spectrum of compound 11

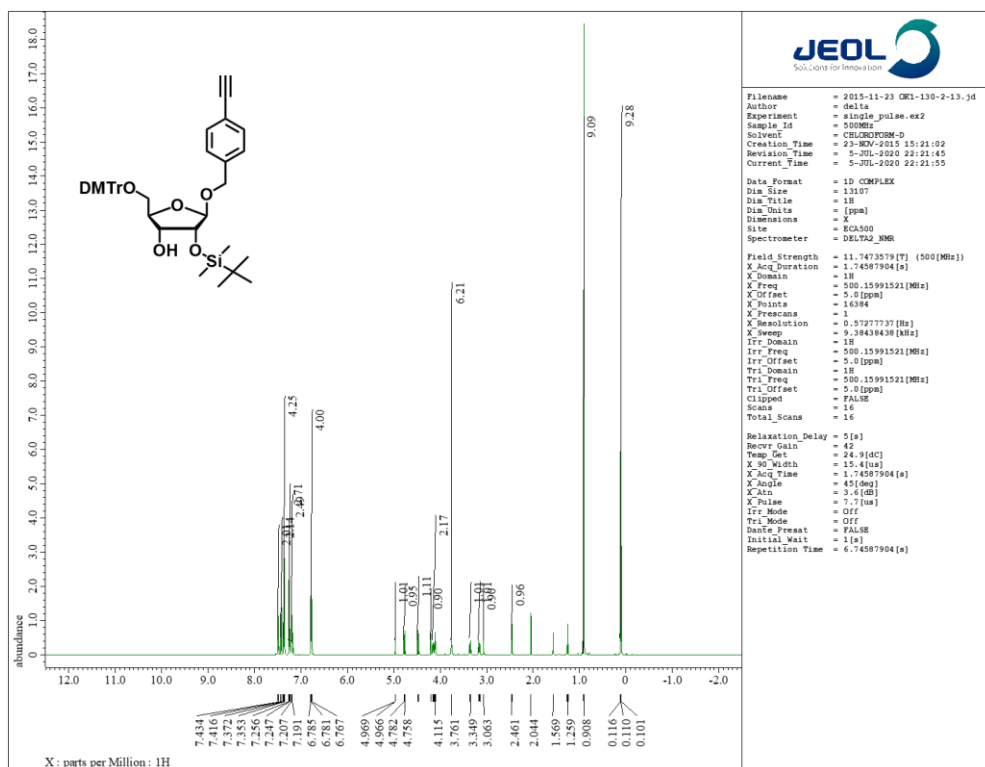

# <sup>13</sup>C NMR spectrum of compound 11

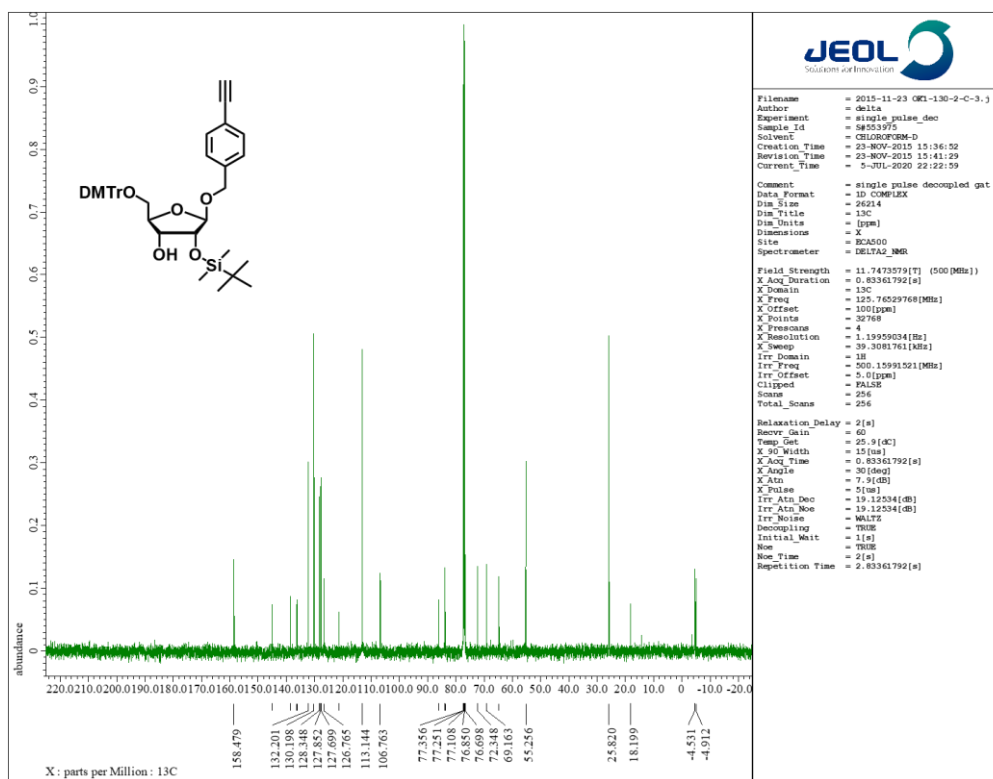

# <sup>1</sup>H NMR spectrum of compound 12

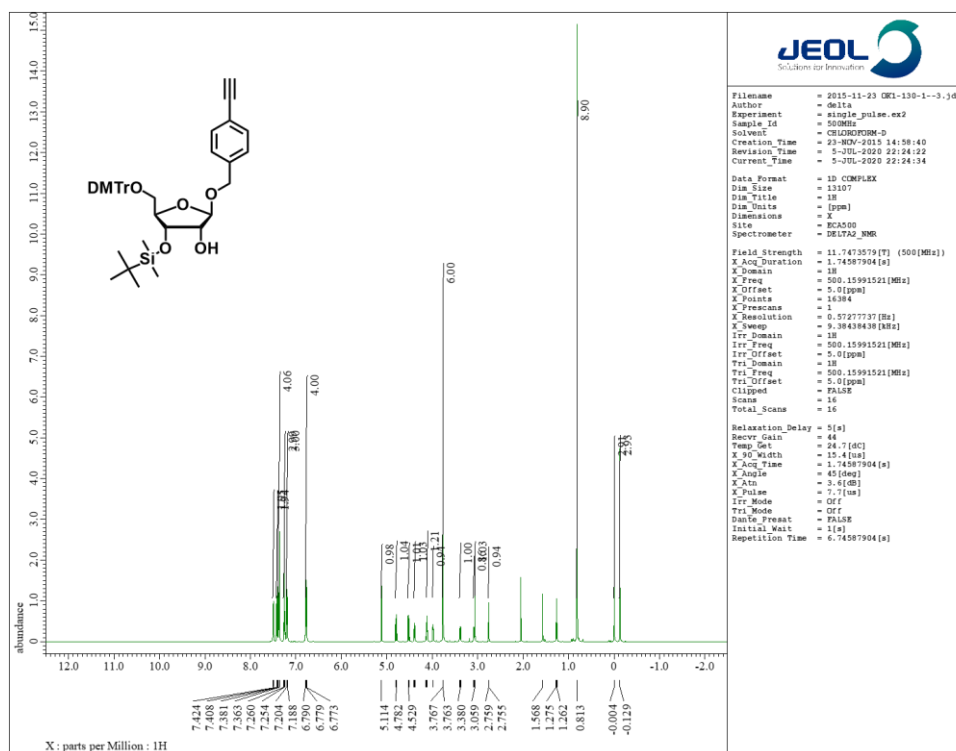

# <sup>13</sup>C NMR spectrum of compound 12

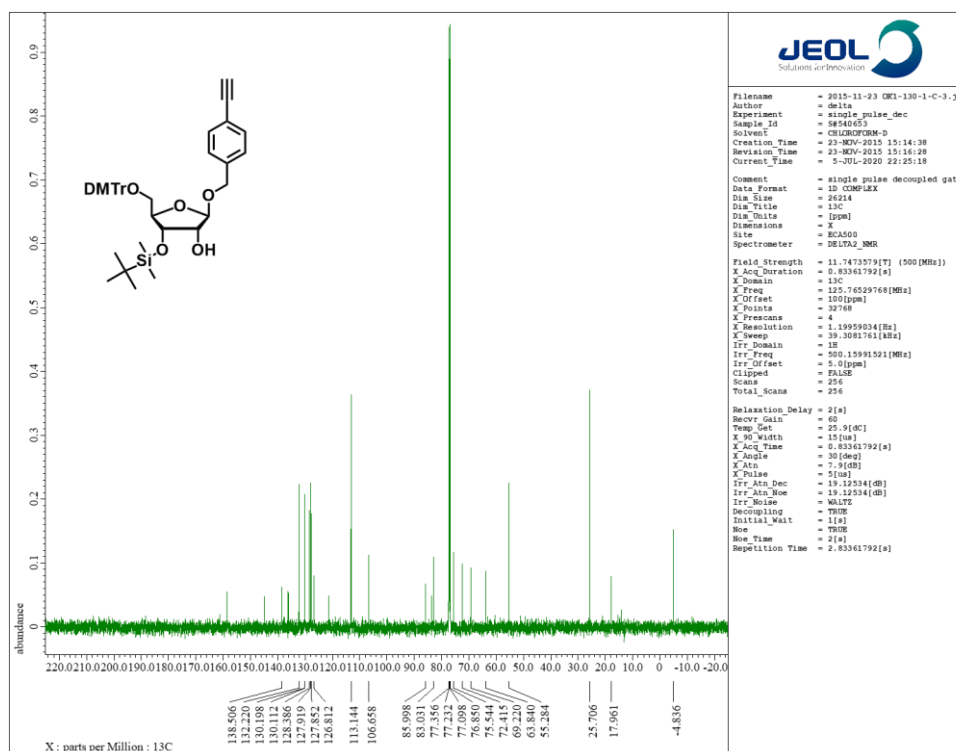

# <sup>1</sup>H NMR spectrum of compound 13

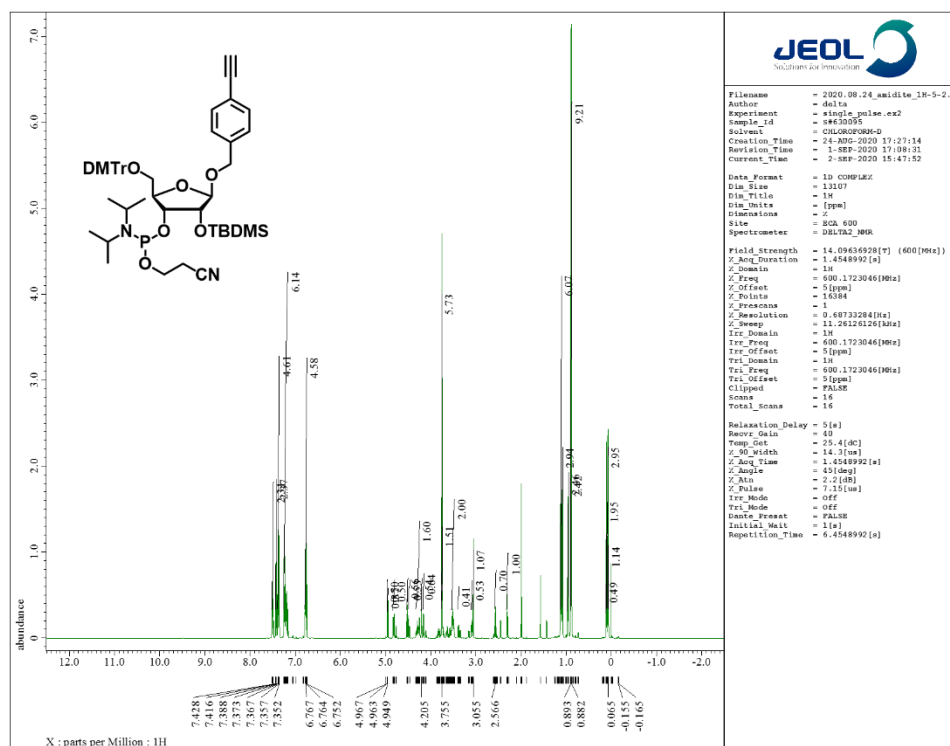

# <sup>13</sup>C NMR spectrum of compound 13

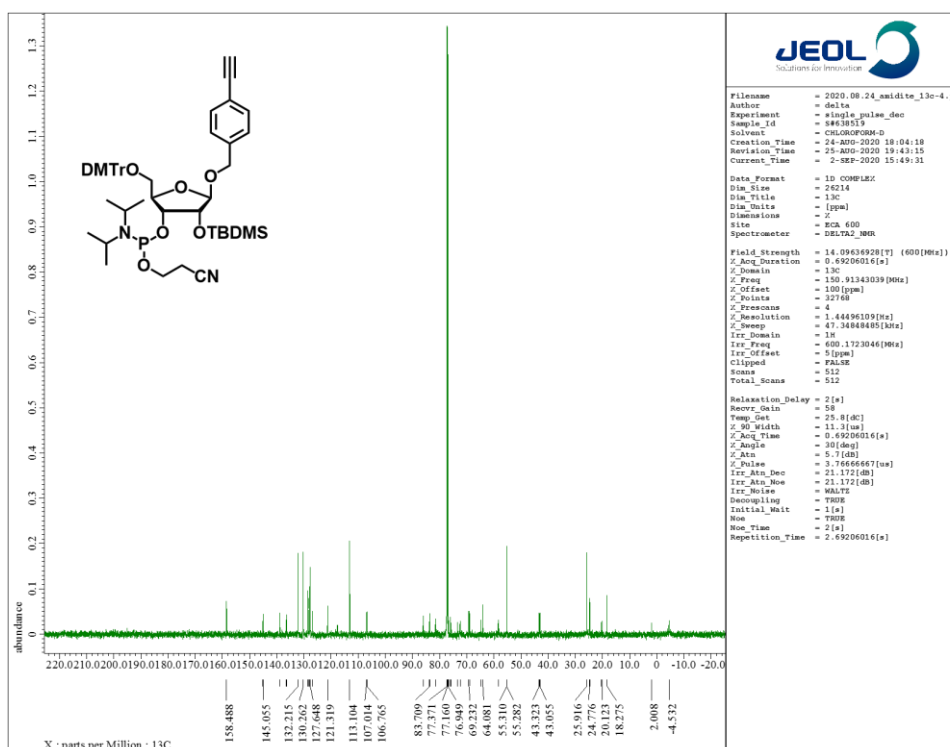

<sup>31</sup>P NMR spectrum of compound **13**

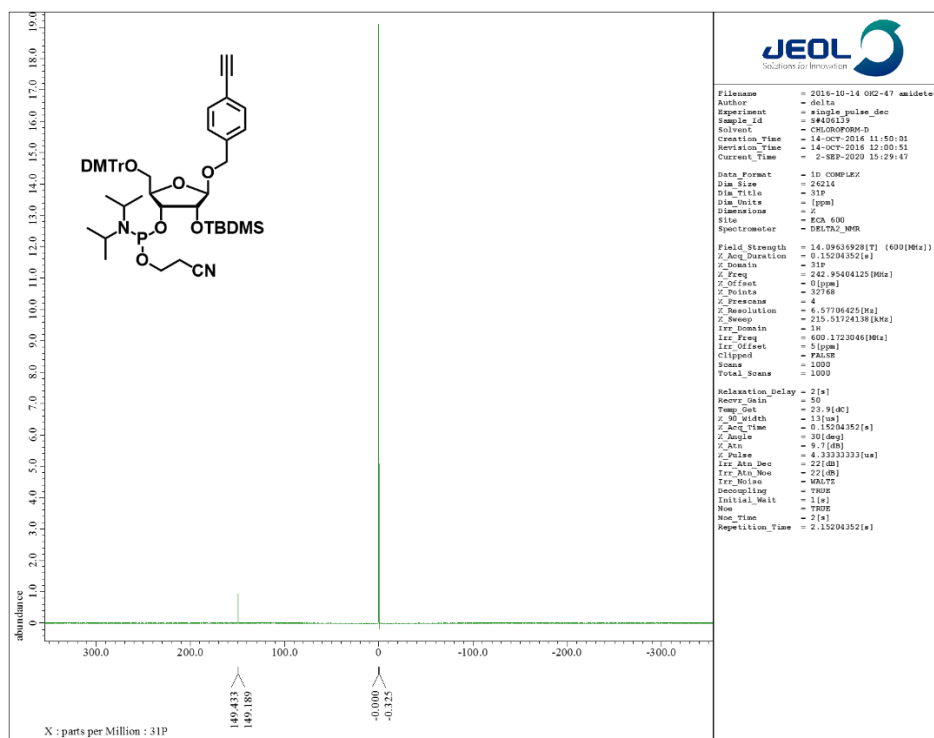

Supplement: d0ra05919f1.pdf [file d0ra05919f1.pdf]
